# Supplementary material
Source: PubMed Central journal article supplement (PMC2649342)
Supplement: 2008.001156_1.pdf [file 2008.001156_1.pdf]

# Expression pattern of XBP1(S) in human B-cell lymphomas

Lorena Maestre,<sup>1</sup> Reuben Tooze,<sup>2,3</sup> Marta Cañamero,<sup>4</sup> Santiago Montes-Moreno,<sup>5</sup> Rocio Ramos,<sup>1</sup> Gina Doody,<sup>2</sup> May Boll,<sup>3</sup> Sharon Barrans,<sup>3</sup> Sara Baena,<sup>1</sup> Miguel Angel Piris,<sup>5</sup> and Giovanna Roncador<sup>1</sup>

<sup>1</sup>Monoclonal Antibodies Unit, Biotechnology Program, Spanish National Cancer Centre (CNIO), Madrid, Spain; <sup>2</sup>Section of Experimental Haematology, Leeds Institute of Molecular Medicine, St James's University Hospital, Leeds, UK; <sup>3</sup>Haematological Malignancy Diagnostic Service, Leeds Teaching Hospitals NHS Trust, St James's University Hospital, Leeds, UK; <sup>4</sup>Comparative Pathology Unit, Biotechnology Program, Spanish National Cancer Centre (CNIO), Madrid, Spain; <sup>5</sup>Lymphoma Group, Molecular Pathology Program, Spanish National Cancer Centre (CNIO), Madrid, Spain

Citation: Maestre L, Tooze R, Cañamero M, Montes-Moreno S, Ramos R, Doody G, Boll M, Barrans S, Baena S, Piris MA, and Roncador G. Expression pattern of XBP1(S) in human B cell lymphomas. *Haematologica* 2009; doi: 10.3324/haematol.001156

## Methods

Immunofluorescent staining was performed on human tonsil sections after heat mediated antigen retrieval. Primary antibodies were mouse anti-XBP1(S) clone 143F, rabbit anti-BLIMP1 (rabbit polyclonal), goat anti-PAX5 polyclonal (Santa Cruz Biotechnology). Secondary antibodies for immunofluorescence were Alexa Fluor 488 donkey anti-mouse, Alexa Fluor 594 donkey anti-rabbit, and biotinylated donkey anti-goat coupled with AMCA-Avidin (Vector Labs, UK) for blue fluorescence. Images were taken with a 63x/1.25 oil (total magnification: 630x) objective using a Zeiss Axio Imager Z1 imaging fluorescence microscope (Carl Zeiss Jena GmbH, Jena, Germany) with a Digital Microscope Camera ProgRes MF (Jenoptik, Jena, Germany). Images were captured and processed using the ISIS3 image capture system (MetaSystems, Altlussheim, Germany). Images were subject to thresholding, with lower thresholds set at the median fluorescence. Composite and single channel images are shown.

A

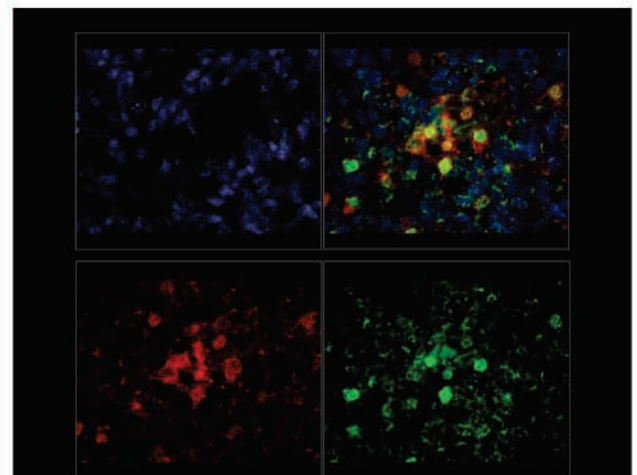

B

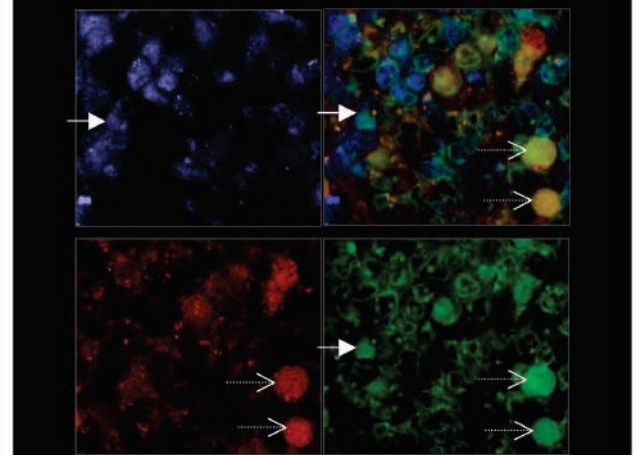

C

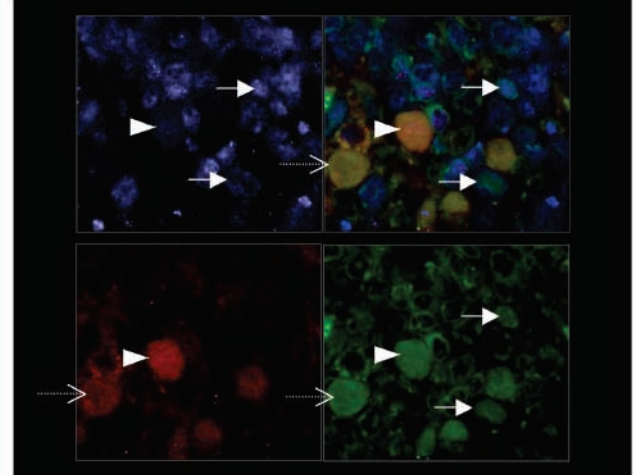

**Online Supplementary Figure S1.** XBP1(S) expression is observed in BLIMP1 and PAX5 expressing cells. Three representative fields are shown from reactive tonsil tissue. In each case composite and single channel images are shown. PAX5 in blue, XBP1(S) in green, BLIMP1 in red, and composite image top right. (A) Shows image as in Figure 1 E with single channel images. (B) and (C) additional representative fields at higher magnification. In (B) and (C) open arrows identify nuclei co-expressing BLIMP1 and XBP1(S) in the absence PAX5. Arrow heads identify nuclei co-expressing BLIMP1, XBP1(S) and PAX5. Solid arrows identify nuclei co-expressing BLIMP1 and XBP1(S) in the absence of PAX5.
